# Supplementary material for: Mating system and speciation I: Accumulation of genetic incompatibilities in allopatry
Source: PubMed Central journal article supplement (PMC9799327; doi:10.1371/journal.pgen.1010353), 2022-12-15
Supplement: pgen.1010353.s001.pdf [file pgen.1010353.s001.pdf]

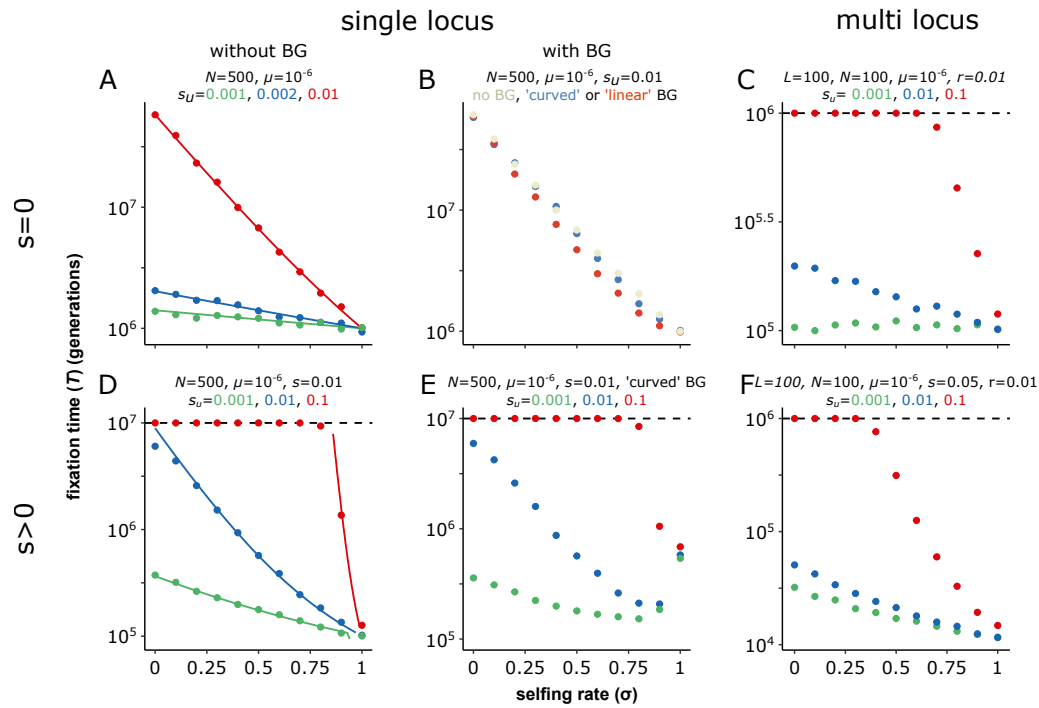

**Fig S1. Effects of selfing on the accumulation of underdominant mutations.** Outcomes of the simulations (circles) for the number of generations to fixate either one derived allele (single locus; A, B, D, E), or ten derived alleles (multi-locus models; C, F). The top row corresponds to symmetrical underdominant mutations (*i.e.*,  $s = 0$ ). The bottom row corresponds to asymmetrical underdominant mutations (*i.e.*,  $s > 0$ ). Single locus simulations were performed either with (A, D) or without (B, E) background selection, BG. The dashed horizontal lines correspond to the threshold after which simulations stopped to avoid computing burden. 1,000 iterations. Lines on A and D correspond to numerical approximations.
