# Supplementary material for: Mating system and speciation I: Accumulation of genetic incompatibilities in allopatry
Source: PubMed Central journal article supplement (PMC9799327; doi:10.1371/journal.pgen.1010353), 2022-12-15
Supplement: pgen.1010353.s003.pdf [file pgen.1010353.s003.pdf]

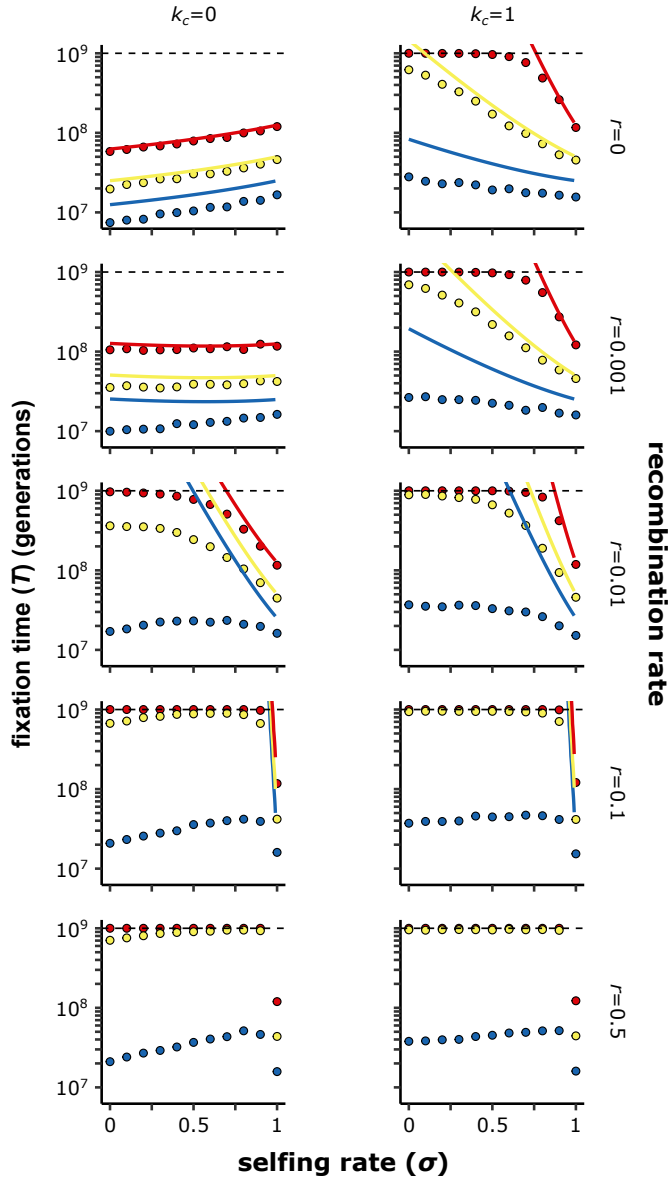

**Fig S3. Effects of selfing on the accumulation of a pair of compensatory mutations (two-locus model).** Analytical approximations (lines; eq. 14) and outcomes of the two-locus simulations (dots) for the mean number of generations needed to fixate a pair of compensatory mutations. The recombination rate between the two-locus ( $r$ ) ranges from 0 (top) to 0.5 (down), and the coefficient of dominance of the double heterozygotes ( $k_c$ ) is set to 0 (left) or 1 (right). The strength of the deleterious effect ( $s_c$ ) is set to 0.005 (blue), 0.010 (yellow), or 0.025 (red). The threshold after which simulations terminate was set to  $10^9$  generations (dashed line). Selfing rate ( $\sigma$ ) ranges from 0 to 1, with a 0.1 increment.  $N = 1,000$ ,  $\mu = 10^{-5}$ ,  $h_c = 0.5$ . 1000 iterations.
