# Supplementary material for: Mating system and speciation I: Accumulation of genetic incompatibilities in allopatry
Source: PubMed Central journal article supplement (PMC9799327; doi:10.1371/journal.pgen.1010353), 2022-12-15
Supplement: pgen.1010353.s004.pdf [file pgen.1010353.s004.pdf]

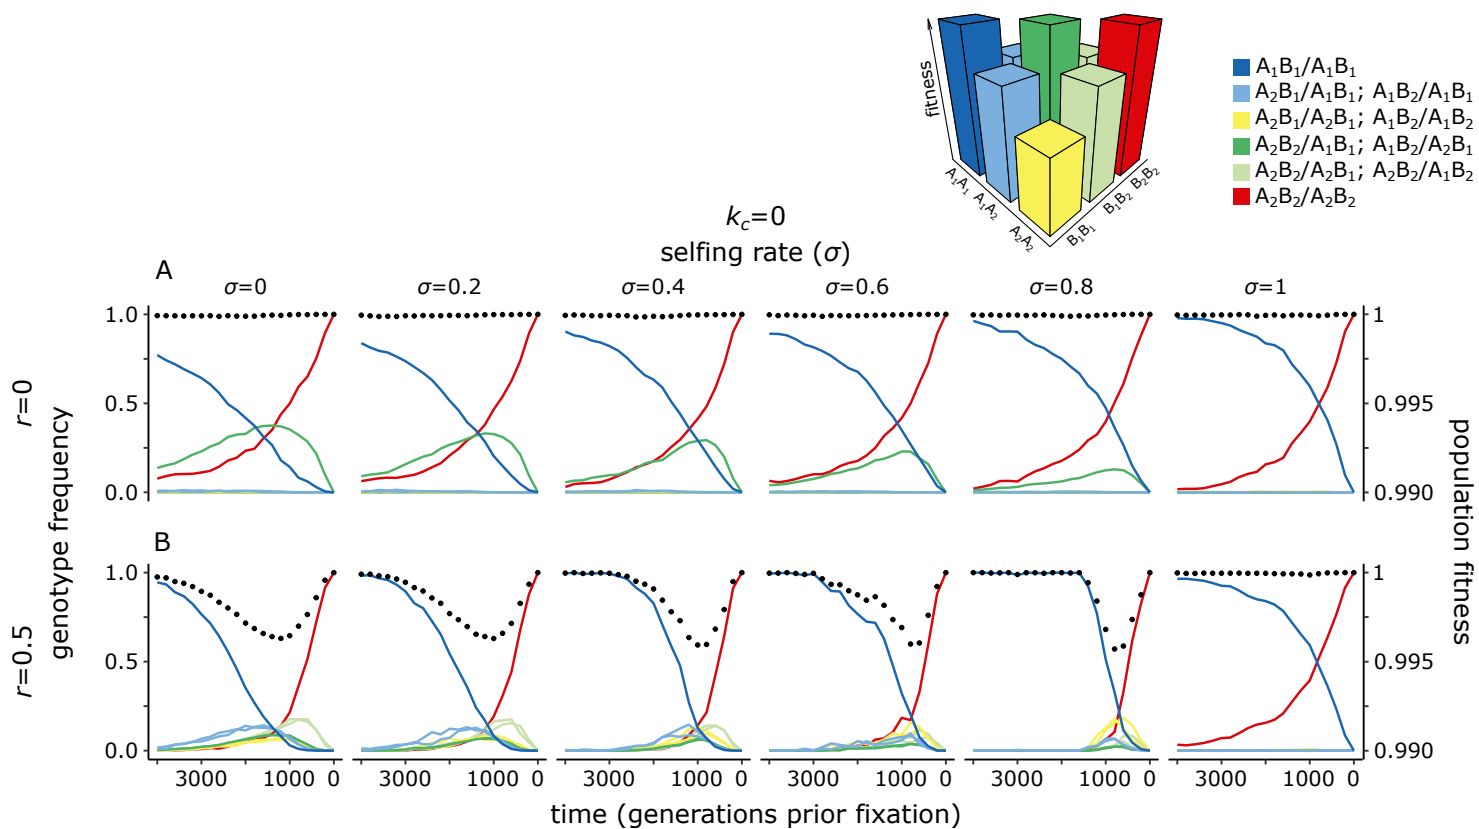

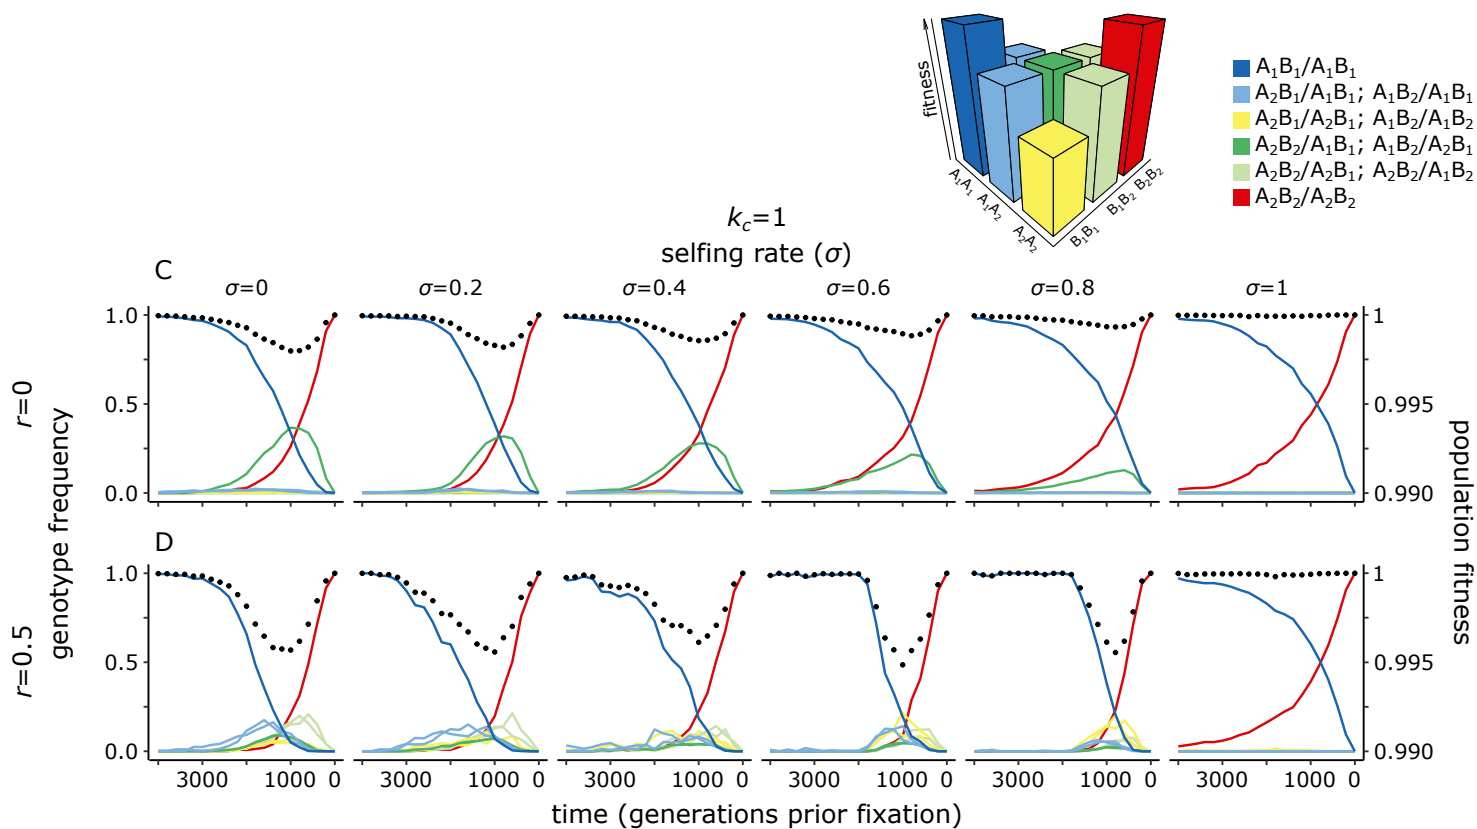

**Fig S4. Effects of selfing rate on the fitness of a population, and the path taken on the fitness landscape, over the 4200 generations preceding the fixation of the pair of compensatory mutation (two-locus model).** Outcomes of the two-locus simulations showing population fitness (black dots, right y axis) and the frequencies of the 10 possible genotypes on the two-locus fitness landscapes (solid lines, left y axis). Selfing rate ( $\sigma$ ) ranges from 0 (left) to 1 (right), with a 0.2 increment. The coefficient of dominance of the double heterozygotes ( $k_c$ ) is set to 0 (A, B) or 1 (C, D), and the recombination rate between the two loci is set to 0 (A, C) or to 0.5 (B, D).  $N = 1,000$ ,  $\mu = 10^{-5}$ ,  $h_c = 0.5$ ,  $s_c = 0.01$ . 100 iterations.
