# Supplementary material for: Mating system and speciation I: Accumulation of genetic incompatibilities in allopatry
Source: PubMed Central journal article supplement (PMC9799327; doi:10.1371/journal.pgen.1010353), 2022-12-15
Supplement: pgen.1010353.s006.pdf [file pgen.1010353.s006.pdf]

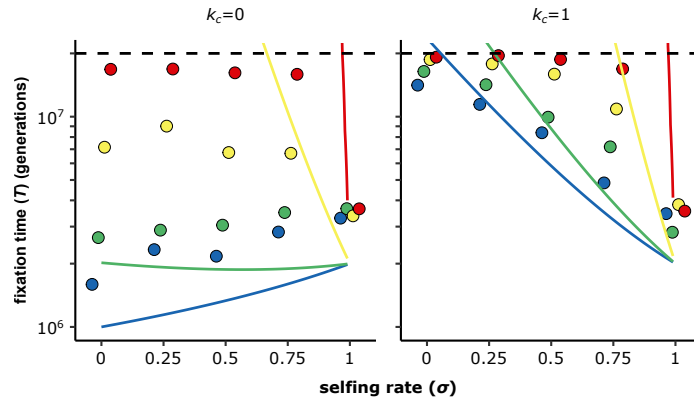

**Fig S6. Effects of selfing on the accumulation of compensatory mutations (multi-locus model).** The graph shows the two-locus analytical approximations (lines; eq. 14) and the outcomes of the multi-locus simulations (dots) for the mean number of generation needed for the fixation of at least two compensatory mutations. The threshold after which the simulation terminates is set to  $2.10^7$  generations (dashed lines). The coefficient of dominance of the double heterozygotes ( $k_c$ ) is set to 0 (left) or 1 (right), and the recombination rate between each locus is set to 0 (blue), 0.0001 (green), 0.001 (yellow), or 0.01 (red). Selfing rate ( $\sigma$ ) ranges from 0 to 1, with a 0.25 increment.  $L = 100$ ,  $N = 200$ ,  $\mu = 10^{-6}$ ,  $h_c = 0.5$ ,  $s_c = 0.04$ . 100 iterations.
