# Supplementary material for: Mating system and speciation I: Accumulation of genetic incompatibilities in allopatry
Source: PubMed Central journal article supplement (PMC9799327; doi:10.1371/journal.pgen.1010353), 2022-12-15
Supplement: pgen.1010353.s007.pdf [file pgen.1010353.s007.pdf]

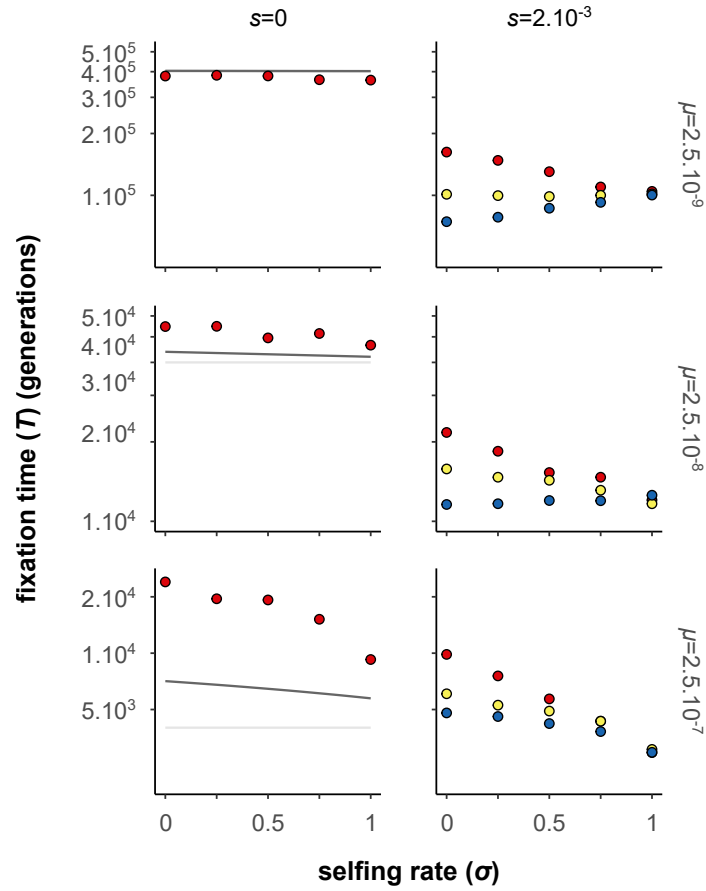

**Fig S7. Effects of selfing and selection on the accumulation of BDMi mutations (multi-locus model).** The panel displays the fixation time estimated when the mutation rate,  $\mu$ , is either  $2.5 \cdot 10^{-9}$  (top),  $2.5 \cdot 10^{-8}$  (middle), or  $2.5 \cdot 10^{-7}$  (bottom). The strength of selection on the derived alleles,  $s$ , is either 0 (left), or  $2 \cdot 10^{-3}$  (right). When there is selection, the dominance coefficient of the derived alleles,  $h$ , is either recessive (0.1, red), codominant (0.5, yellow), or dominant (0.9, blue). The solid lines in the neutral scenario correspond to analytical approximations:  $1/2\mu$  (light grey), and equation (17) (dark grey) (see BDMi Results section for details on the approximations).  $L = 1,000$ ,  $N = 1,000$ ,  $h_b = k_b = 0.5$ ,  $s_b = 10^{-2}$ ,  $r = 10^{-3}$ . 1,000 iterations.
