# Supplementary material for: Mating system and speciation I: Accumulation of genetic incompatibilities in allopatry
Source: PubMed Central journal article supplement (PMC9799327; doi:10.1371/journal.pgen.1010353), 2022-12-15
Supplement: pgen.1010353.s009.pdf [file pgen.1010353.s009.pdf]

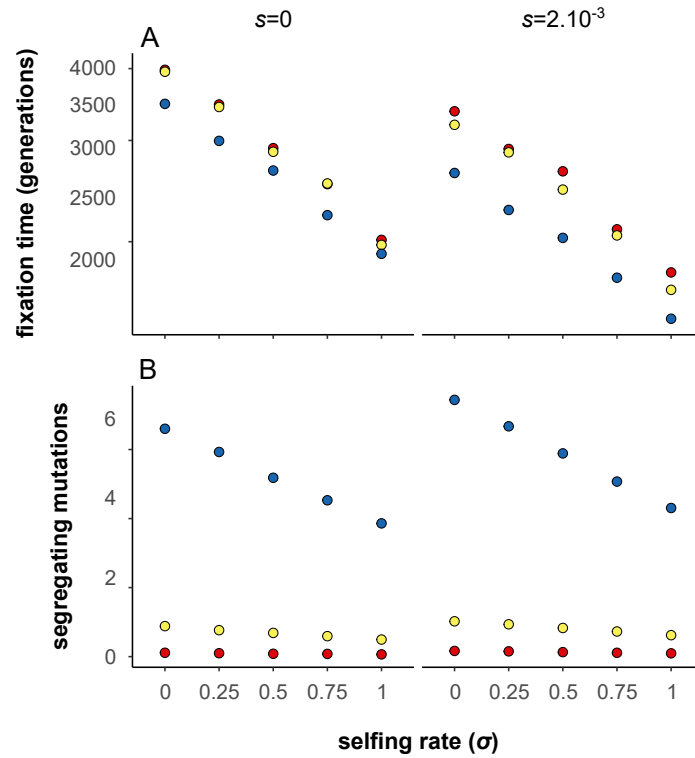

**Fig S9. Effects of selfing and selection on the fixation time and the number of BDMi mutations segregating in a population (multi-locus model).** The panel displays (A) the time a mutation takes to fixate (fixation time) and (B) the mean number of BDMi mutations segregating in a population sampled every 100 generations. The mutation rate,  $\mu$ , is either  $2.5.10^{-9}$  (red),  $2.5.10^{-8}$  (yellow), or  $2.5.10^{-7}$  (blue). The strength of selection on the derived alleles,  $s$ , is either 0 (left), or  $2.10^{-3}$  (right).  $L = 1,000$ ,  $N = 1,000$ ,  $h = 0.5$ ,  $h_b = k_b = 0.5$ ,  $s_b = 10^{-2}$ ,  $r = 10^{-3}$ . 1,000 iterations.
