# Supplementary material for: Mating system and speciation I: Accumulation of genetic incompatibilities in allopatry
Source: PubMed Central journal article supplement (PMC9799327; doi:10.1371/journal.pgen.1010353), 2022-12-15
Supplement: pgen.1010353.s010.pdf [file pgen.1010353.s010.pdf]

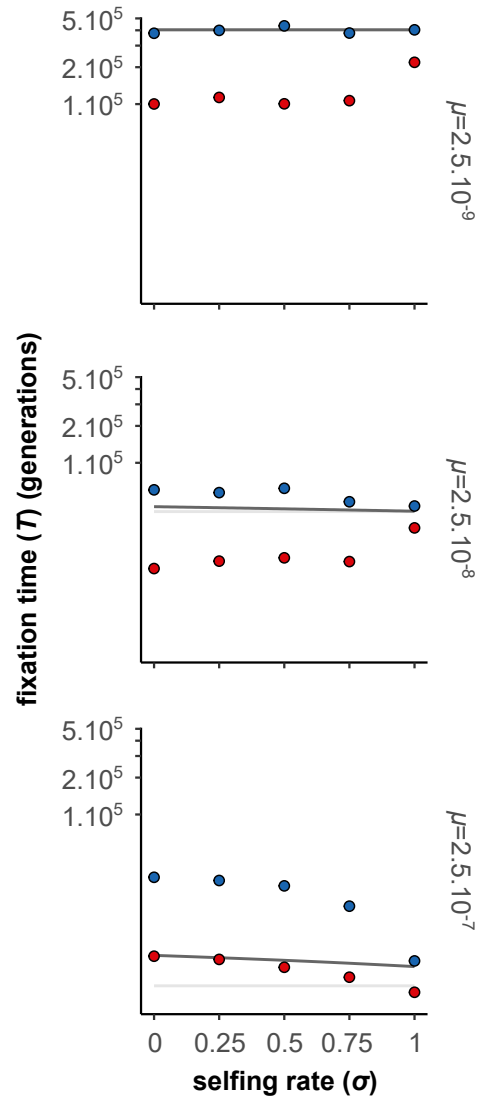

**Fig S10. Effects of selfing, selection and background selection on the time to fixation fixation of BDMi mutations (multi-locus model).** The graph displays the mean fixation time of BDMi mutations when the strength of selection on the derived alleles,  $s$ , is either equal to 0 (blue) or to  $2.10^{-3}$  b(red). The mutation rate,  $\mu$ , is either  $2.5 \cdot 10^{-9}$  (top),  $2.5 \cdot 10^{-8}$  (middle), or  $2.5 \cdot 10^{-7}$  (bottom). In addition to the BDMi mutations, deleterious mutations with a coefficient of dominance of 0.1 and a strength of selection of  $-10^{-3}$  occurred at a  $5 \cdot 10^{-3}$  rate. The solid lines in the neutral scenario correspond to analytical approximations:  $1/2\mu$  (light grey), and equation (17) (dark grey) (see BDMi Results section for details on the approximations).  $L = 1,000$ ,  $N = 1,000$ ,  $h = 0.5$ ,  $h_b = k_b = 0.5$ ,  $s_b = 10^{-2}$ ,  $r = 10^{-3}$ . 100 iterations.
